# Supplementary material for: Ru single atoms and nanoclusters on highly porous N-doped carbon as a hydrogen evolution catalyst in alkaline solutions with ultrahigh mass activity and turnover frequency
Source: Royal Society of Chemistry journal article supplement (doi:10.1039/d1ta02495g), 2021-01-01
Supplement: d1ta02495g1.pdf [file d1ta02495g1.pdf]

Electronic Supplementary Material (ESI) for Journal of Materials Chemistry A.

This journal is © The Royal Society of Chemistry 2021

## Supporting information

**Ru single atoms and nanoclusters on highly porous N-doped carbon as hydrogen evolution catalyst in alkaline solutions with ultrahigh mass activity and turnover frequency**

*Yijun Li,<sup>‡a</sup> Huijing Liu,<sup>‡a</sup> Bing Li,<sup>a</sup> Zhenzhen Yang,<sup>a</sup> Zhenguo Guo,<sup>a</sup> Jian-Bo He,<sup>a</sup>*

*Jianhui Xie<sup>\*a</sup> and Tai-Chu lau<sup>\*b</sup>*

*<sup>a</sup>School of Chemistry and Chemical Engineering, Hefei University of Technology, Hefei 230009, People's Republic of China. E-mail: [jianhuixie@hfut.edu.cn](mailto:jianhuixie@hfut.edu.cn)*

*<sup>b</sup>Department of Chemistry, City University of Hong Kong, Kowloon Tong, Hong Kong, P R China. [bhtclau@cityu.edu.hk](mailto:bhtclau@cityu.edu.hk)*

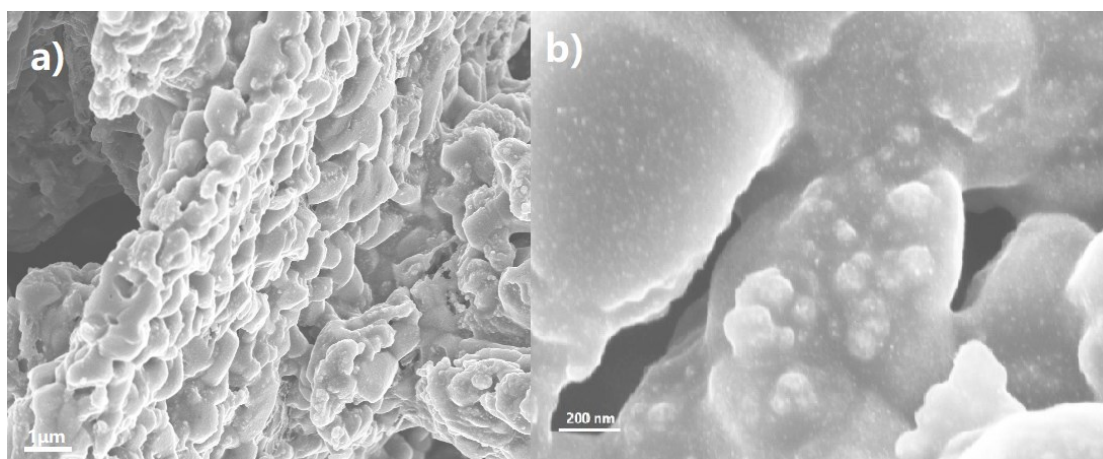

**Fig. S1** SEM images of Ru/NC.

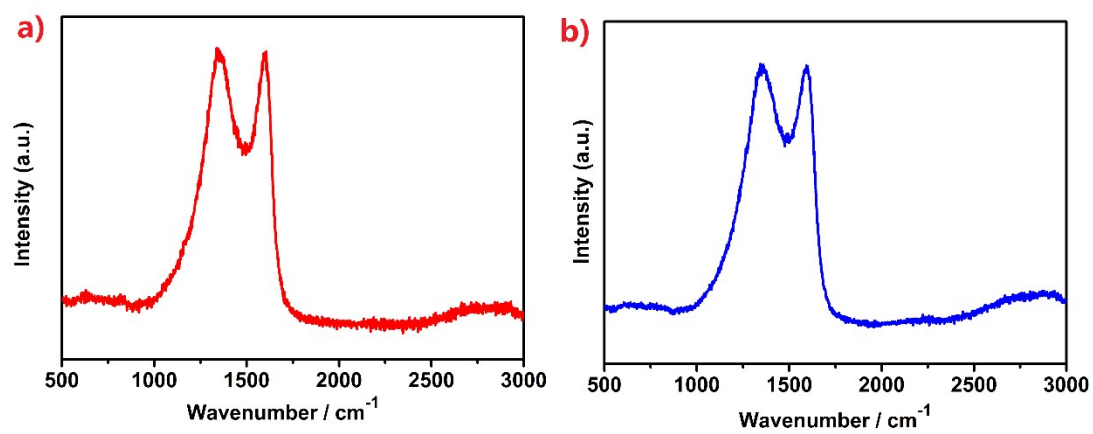

**Fig. S2** Raman spectra of the catalysts. a) Ru/p-NC. b) Ru/NC.

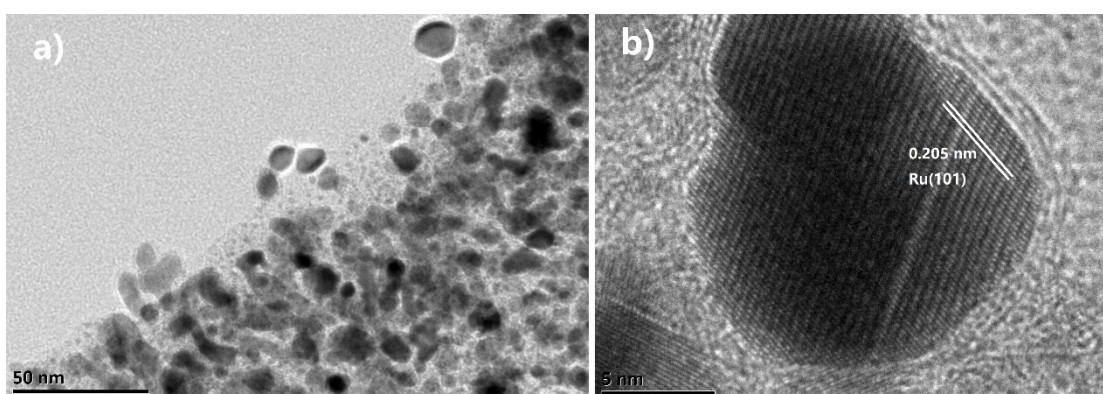

**Fig. S3** a) TEM image of Ru/NC. b) HR-TEM image of Ru/NC.

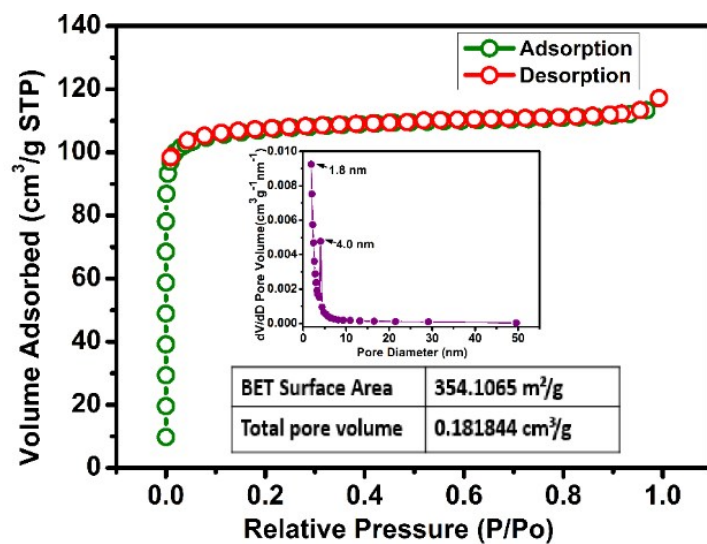

Fig. S4 N<sub>2</sub> adsorption/desorption isotherms of Ru/NC. Inset: corresponding pore size distribution.

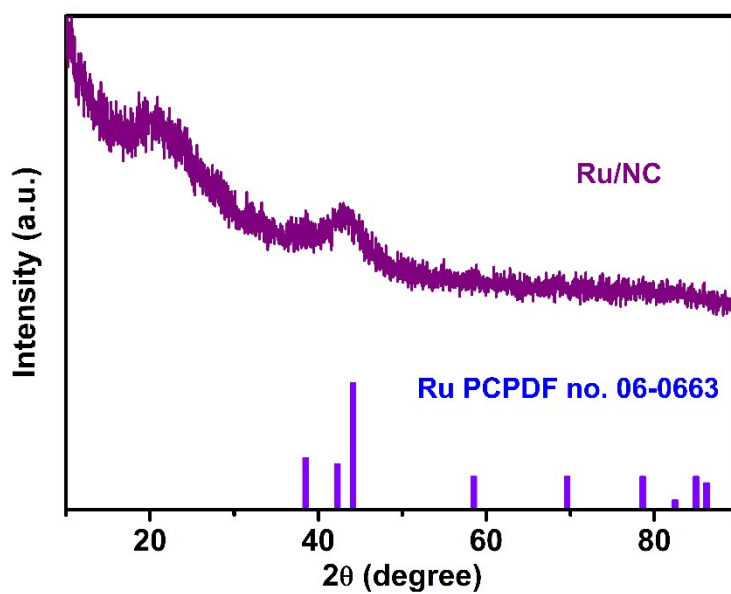

Fig. S5 XRD spectrum of Ru/NC.

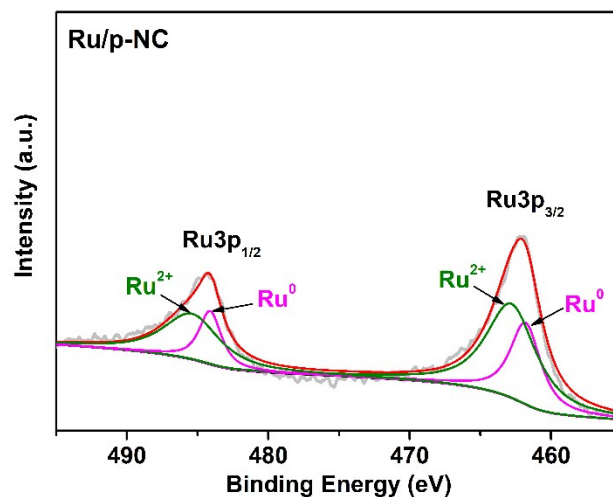

Fig. S6 High-resolution XPS spectrum of Ru 3p of Ru/p-NC.

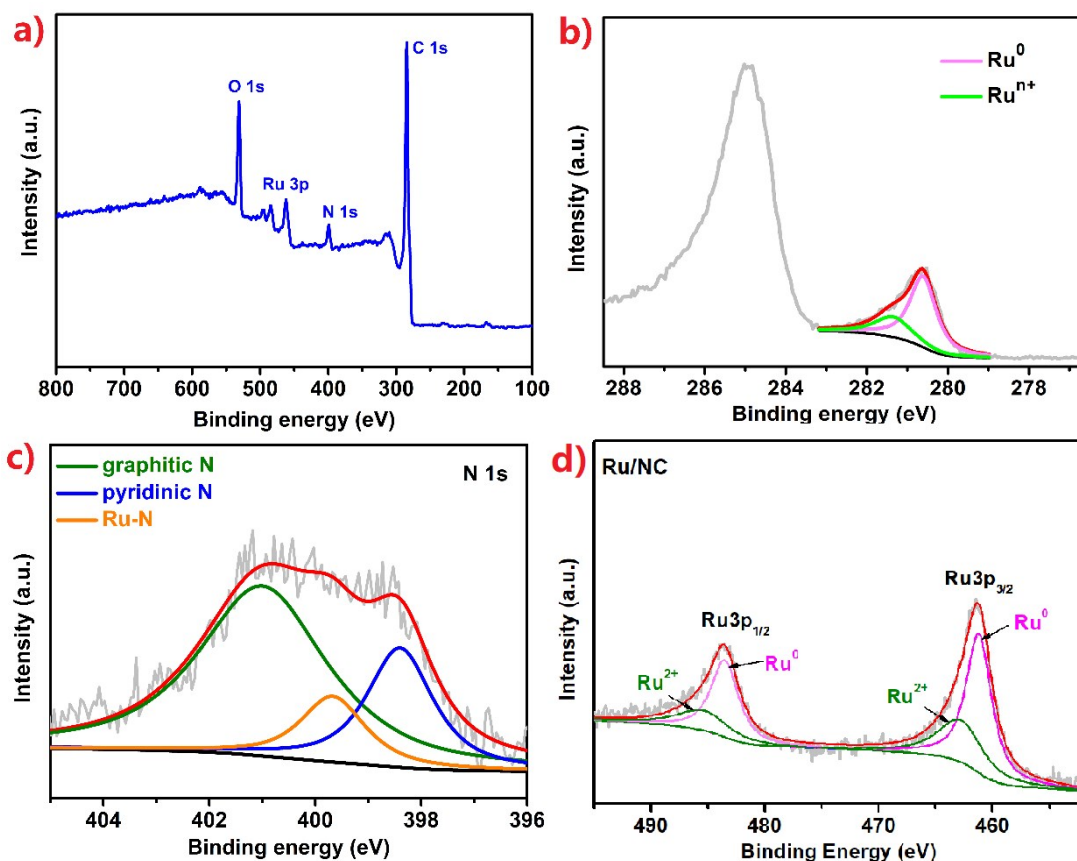

Fig. S7 a) XPS spectrum of Ru/NC. b) High-resolution XPS spectrum of C1s and Ru 3d<sub>5/2</sub>. c) High-resolution XPS spectrum of N 1s. d) High-resolution XPS spectrum of Ru 3p.

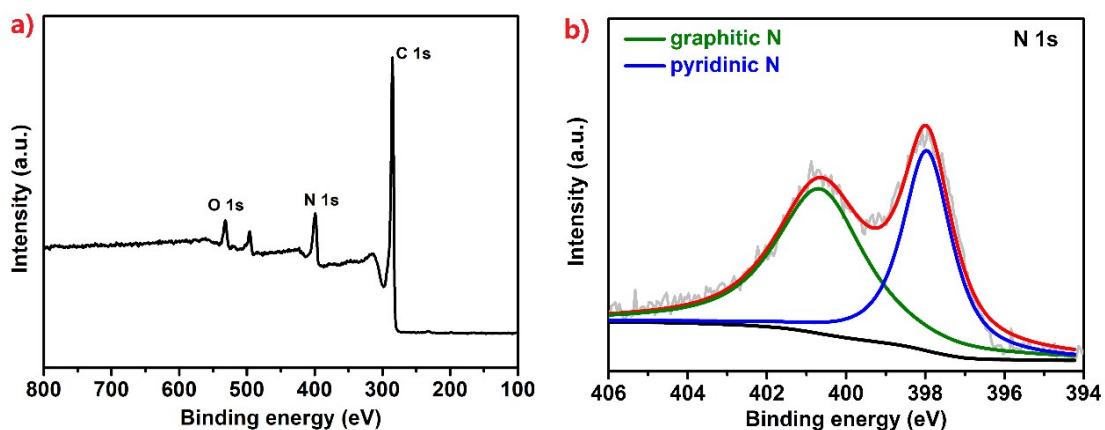

**Fig. S8** a) XPS spectrum of NC. d) High-resolution XPS spectrum of N 1s.

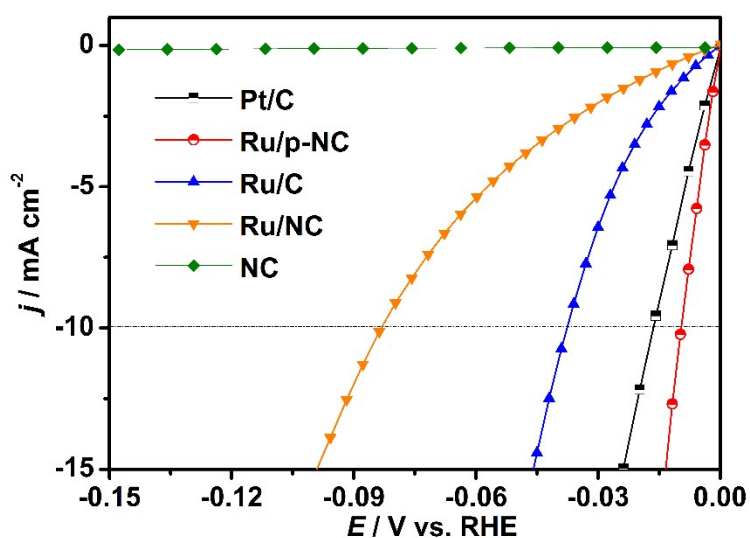

**Fig. S9** A enlarged view of the HER polarization curves of Ru/p-NC, Ru/NC, Pt/C (20 wt %) and Ru/C (5 wt%) in 1.0 M KOH at a scan rate of  $5 \text{ mV s}^{-1}$ .

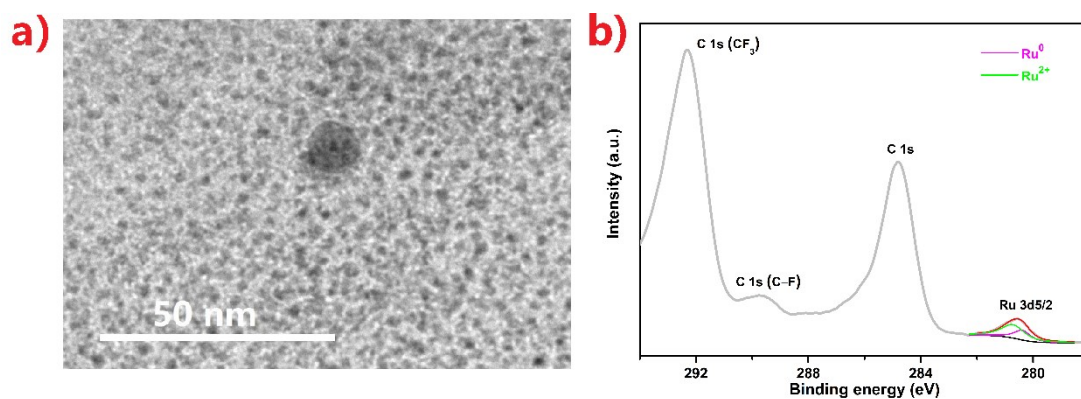

**Fig. S10** a) TEM image and b) High-resolution XPS spectrum of Ru/p-NC after the test of long-term stability.

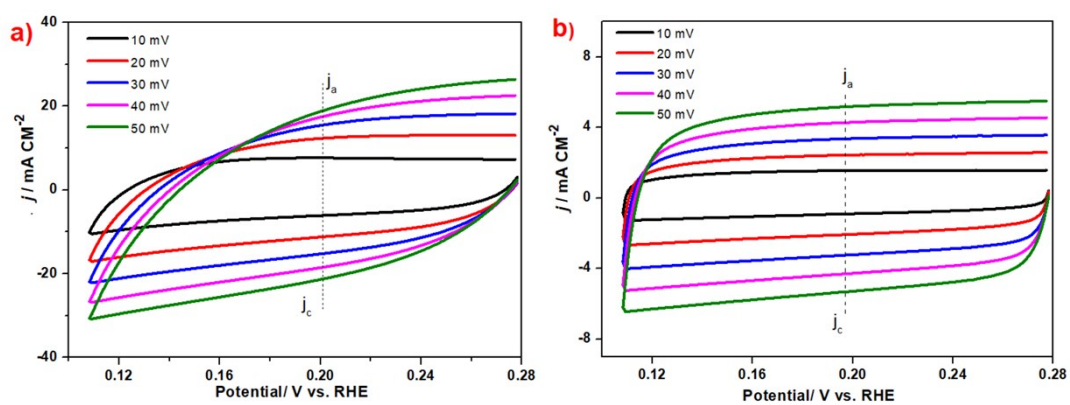

**Fig. S11** Cyclic voltammetry curves of a) Ru/p-NC and b) Ru/NC.

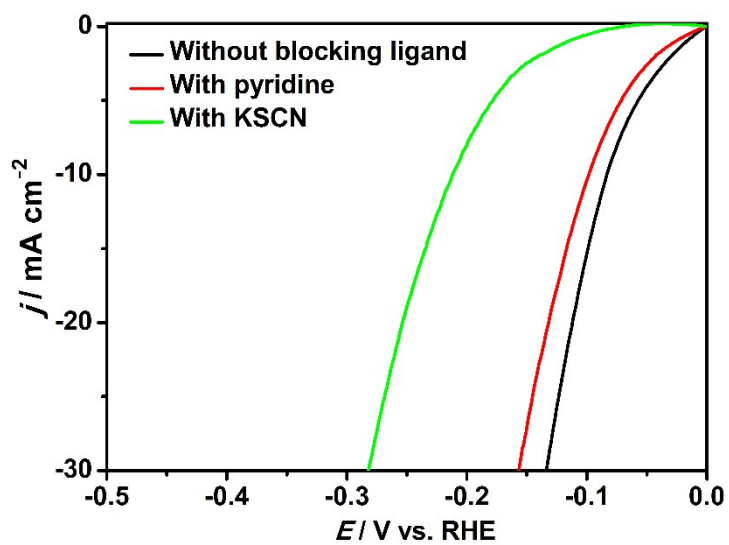

**Fig. S12** HER polarization curves of the Ru/NC electrocatalyst with and without blocking ligands in 1 M KOH solution.

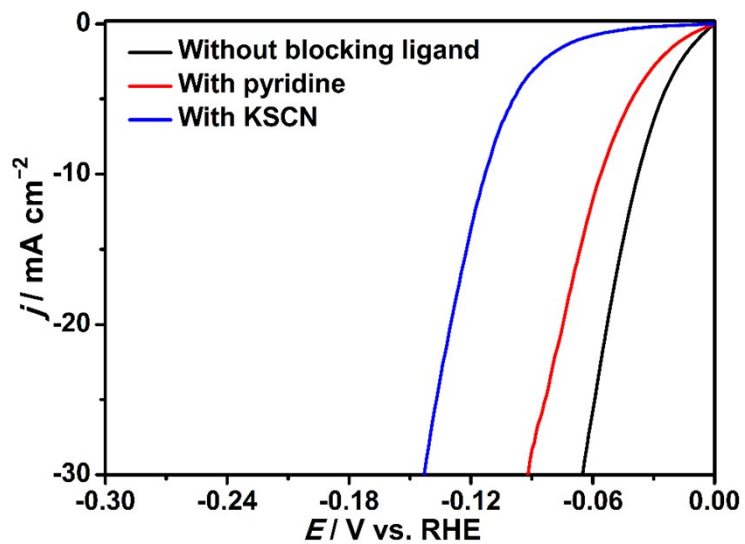

**Fig. S13** HER polarization curves of the Ru/C electrocatalyst with and without blocking ligands in 1 M KOH solution.

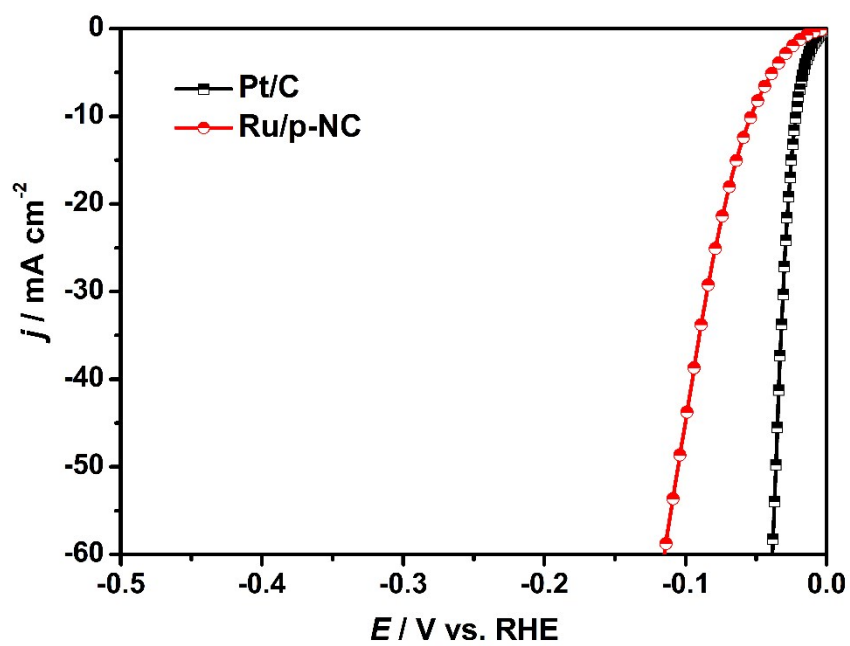

**Fig. S14** HER polarization curves of the Ru/p-NC and Pt/C in 0.5 M H<sub>2</sub>SO<sub>4</sub>.



**Table S1** Charge transfer resistances ( $R_{ct}$ ) obtained by Nyquist plots in 1.0 M KOH at an applied overpotential of 10 mV.

| Catalyst | $R_{ct} / \Omega$ |
|----------|-------------------|
| Ru/p-NC  | 4.7               |
| Ru/NC    | 35.5              |
| Ru/C     | 20.0              |
| Pt/C     | 9.5               |

**Table S2** Summary of HER performance of Ru-based catalysts in alkaline condition.

| Catalyst            | $\eta_{10} /$<br>mV | Tafel<br>slope /<br>mV dec <sup>-1</sup> | Mass<br>activity/A<br>mg <sub>Ru</sub> <sup>-1</sup> | TOF/ H <sub>2</sub> s <sup>-1</sup>  | $R_{ct}$                                    | Reference |
|---------------------|---------------------|------------------------------------------|------------------------------------------------------|--------------------------------------|---------------------------------------------|-----------|
| Ru/p-NC             | 10                  | 17                                       | 17 A mg <sub>Ru</sub> <sup>-1</sup> at<br>25 mV      | 8.9 at 25<br>mV                      | 4.7 $\Omega$                                | This work |
| Ru@C <sub>2</sub> N | 17                  | 38                                       | —                                                    | 0.76 at<br>25mV, 1.66<br>at 50mV     | 43.7 $\Omega$                               | 1         |
| Ru@GnP              | 22                  | 28                                       | 0.23A mg <sub>Ru</sub> <sup>-1</sup><br>at 25mV      | —                                    | —                                           | 2         |
| Ru@NC               | 26                  | 36                                       | 17A mg <sub>Ru</sub> <sup>-1</sup> at<br>100 mV      | 10.8 at 100<br>mV                    | —                                           | 3         |
| Ru@MW<br>CNT        | 17                  | 27                                       | 0.186 A mg <sub>Ru</sub> <sup>-1</sup><br>at 20 mV   | 0.4 at<br>25 mV                      | 2.38 $\Omega$<br>cm <sup>2</sup> at<br>45mV | 4         |
| Ru/NC/G<br>F        | 21                  | 31                                       | 8A mg <sub>Ru</sub> <sup>-1</sup> at<br>100 mV       | 4.55 at 100<br>mV                    | 5 $\Omega$                                  | 5         |
| Ru@C <sub>4</sub> N | 7                   | 18                                       | —                                                    | 0.65 at 25<br>mV                     | 0.9478<br>$\Omega$                          | 6         |
| Ru-HPC              | —                   | 29                                       | —                                                    | 1.79 at 25<br>mV<br>9.2 at 100<br>mV | —                                           | 7         |
| Ru/C-300            | 14                  | 32                                       | —                                                    | —                                    | —                                           | 8         |
| Ru/CN-<br>800       | 14                  | 30                                       | —                                                    | —                                    | 13.7 $\Omega$                               | 9         |
| Ru@NCH<br>NSs       | 28                  | 32                                       | 0.1A mg <sub>Ru</sub> <sup>-1</sup> at<br>38.2mV     | —                                    | —                                           | 10        |



|                       |    |    |                                                 |                  |             |    |
|-----------------------|----|----|-------------------------------------------------|------------------|-------------|----|
| Ru-NC-700             | 12 | 14 | —                                               | —                | 20.7Ω       | 11 |
| Ru-MoO <sub>2</sub>   | 31 | 29 | —                                               | —                | —           | 12 |
| Ru@CN-0.16            | 32 | 53 | —                                               | —                | —           | 13 |
| RuCo@NC               | 28 | 31 | —                                               | —                | 8.58Ω       | 14 |
| RuP <sub>2</sub> @NPC | 52 | 69 | —                                               | —                | —           | 15 |
| RuNi/CQDs-600         | 13 | 40 | 1.68A mg <sub>Ru</sub> <sup>-1</sup><br>at 13mV | —                | 6.45Ω       | 16 |
| 2DPC-RuMo             | 18 | 25 | —                                               | 3.57 at 50<br>mV | 0.9688<br>Ω | 17 |

## References

- (1) J. Mahmood, F. Li, S.-M. Jung, M. S. Okyay, I. Ahmad, S.-J. Kim, N. Park, H. Y. Jeong and J.-B. Baek, *Nat. Nanotechnol.* 2017, **12**, 441-446.
- (2) F. Li, G.-F. Han, H.-J. Noh, I. Ahmad, I.-Y. Jeon and J.-B. Baek, *Adv. Mater.*, 2018, **30**, 1801741.
- (3) Z.-L. Wang, K. Sun, J. Henzie, X. Hao, C. Li, T. Takei, Y.-M. Kang and Y. Yamauchi, *Angew. Chem., Int. Ed.*, 2018, **57**, 5848-5852.
- (4) D. H. Kweon, M. S. Okyay, S.-J. Kim, J.-P. Jeon, H.-J. Noh, N. Park, J. Mahmood and J.-B. Baek, *Nat. Commun.*, 2020, **11**, 1278.
- (5) J. Zhang, P. Liu, G. Wang, P. P. Zhang, X. D. Zhuang, M. W. Chen, I. M. Weidinger and X. L. Feng, *J. Mater. Chem. A*, 2017, **5**, 25314-25318.
- (6) S.-W. Sun, G.-F. Wang, Y. Zhou, F.-B. Wang and X.-H. Xia, *Appl. Mater. Interfaces*, 2019, **11**, 19176-19182.
- (7) T. Qiu, Z. Liang, W. Guo, S. Gao, C. Qu, H. Tabassum, H. Zhang, B. Zhu, R. Zou and Y. Shao-Horn, *Nano Energy*, 2019, **58**, 1-10.
- (8) C. Xu, M. Ming, Q. Wang, C. Yang, G. Fan, Y. Wang, D. Gao, J. Bi and Y. J. Zhang, *J. Mater. Chem. A*, 2018, **6**, 14380-14386.
- (9) X. Cheng, H. Wang, M. Ming, W. Luo, Y. Wang, Y. Yang, Y. Zhang, D. Gao, J. Bi

- and G. Fan, *ACS Sustain. Chem. Eng.*, 2018, **6**, 11487-11492.
- (10) J.-S. Li, M.-J. Huang, X.-N. Chen, L.-X. Kong, Y.-W. Zhou, M.-Y. Wang, J.-L. Li, Z.-X. Wu and X.-F. Xu, *Chem. Comm.*, 2020, **56**, 6802-6805.
- (11) B. Lu, L. Guo, F. Wu, Y. Peng, J. E. Lu, T. J. Smart, N. Wang, Y. Z. Finprock, D. Morris, P. Zhang, N. Li, P. Gao, Y. Ping and S. Chen, *Nat. Commun.*, 2019, **10**, 631.
- (12) P. Jiang, Y. Yang, R. Shi, G. Xia, J. Chen, J. Su and Q. Chen, *J. Mater. Chem. A*, 2017, **5**, 5475-5485.
- (13) J. Wang, Z. Wei, S. Mao, H. Li and Y. Wang, *Energy Environ. Sci.*, 2018, **11**, 800-806.
- (14) J. Su, Y. Yang, G. Xia, J. Chen, P. Jiang and Q. Chen, *Nat. Commun.*, 2017, **8**, 14969.
- (15) Z. Pu, I. S. Amiin, Z. Kou, W. Li and S. Mu, *Angew. Chem., Int. Ed.*, 2017, **56**, 11559-11564.
- (16) Y. Liu, X. Li, Q. Zhang, W. Li, Y. Xie, H. Liu, L. Shang, Z. Liu, Z. Chen, L. Gu, Z. Tang, T. Zhang, and S. Lu, *Angew. Chem. Int. Ed.*, 2020, **59**, 1718 – 1726.
- (17) K. Tu, D. Tranca, F. Rodríguez-Hernández, K. Jiang, S. Huang, Q. Zheng, M. Chen, C. Lu, Y. Su, Z. Chen, H. Mao, C. Yang, J. Jiang, H. Liang and X. Zhuang, *Adv. Mater.*, 2020, **32**, 2005433.
